# Supplementary material for: Discussion on the change rule of different characteristic parameters with Depth in expansion soil graben slopes
Source: Research Square preprint supplement (doi:10.21203/rs.3.rs-5008337/v1), 2025-03-24
Supplement: Supplementary file 1 [file 4e1b2a58fa917ab4edf29d74.xlsx]

## Sheet: Variation of natural dry weight
							Ankang
							0.2	1.51
							0.5	1.61
							0.6	1.62
							0.7	1.65
							0.8	1.67
							0.9	1.69
							1	1.65
							1.1	1.66
							1.2	1.61
							1.3	1.67
							1.4	1.62
							1.5	1.7
							2	1.67
							2.3	1.68
							2.4	1.65
							2.5	1.66
							3	1.67
							Xixiang
							0.2	1.43
							0.5	1.63
							0.6	1.65
							0.7	1.69
							0.8	1.53
							0.9	1.68
							1	1.69
							1.1	1.66
							1.2	1.72
							1.3	1.74
							1.4	1.73
							1.5	1.72
							2	1.7
							2.3	1.65
							2.4	1.68
							2.5	1.69
							3	1.7
							Mianxi
							0.2	1.42
							0.5	1.53
							0.6	1.5
							0.7	1.58
							0.8	1.62
							0.9	1.58
							1	1.62
							1.1	1.59
							1.2	1.55
							1.3	1.58
							1.4	1.62
							1.5	1.63
							2	1.67
							2.3	1.68
							2.4	1.69
							2.5	1.66
							3	1.67

## Sheet: Variation of unconfined compres
					Ankang
					0.1	80
					0.3	45
					0.5	40
					0.9	81
					1.1	105
					1.3	150
					1.5	200
					2	220
					2.5	300
					3	320
					Xixiang
					0.1	80
					0.3	60
					0.5	55
					0.9	110
					1.1	115
					1.3	113
					1.5	210
					2	155
					2.5	145
					3	144
					Mianxi
					0.1	50
					0.3	52
					0.5	30
					0.9	60
					1.1	130
					1.3	129
					1.5	160
					2	195
					2.5	200
					3	195

## Sheet: Variation of three-way expansio
							Ankang
						h	Poz	Pox
						0.3	19.1	4
						0.4	6.6	4.7
						0.5	12.4	4.1
						0.6	6.5	3
						0.7	5.8	3.6
						0.8	18.7	9.6
						1.4	34.5	9.7
						1.5	29.7	18.2
						2.5	28.8	14.3
						3	31	18.8
							Xixiang
						h	Poz	Pox
						0.3	10	3
						0.4	30	13
						0.6	27	12
						0.7	40	10
						1.3	27	9
						1.5	32	18
						1.6	30	9.3
						2.3	27	17
						2.5	30	15
						3	35	14
							Mianxi
						h	Poz	Pox
						0.2	10	3.5
						0.3	12	3
						0.5	23	18
						0.9	16	10
						1.1	17	10.5
						1.3	18	17
						1.5	36.5	18
						1.7	37	16
						2.5	28	18
						3	30	16

## Sheet: Variation of expansion with dep
											Ankang
											h	膨胀率
											0.2	3.8
											0.3	3.1
											0.4	2.3
											0.5	2
											0.6	1.8
											0.7	3.1
											0.9	2.2
											1	1.5
											1.2	1.7
											1.8	1.9
											2	2
											2.5	2.2
											3	2
											Xixiang
											h	膨胀率
											0.3	2.2
											0.4	1.5
											0.6	1.2
											0.9	1.1
											1	0.9
											1.5	1.2
											1.6	1.3
											1.8	1.3
											2	1.5
											2.2	1
											2.3	1.2
											2.7	1.3
											3	1.5
											Mianxi
											0.2	3.3
											0.3	2.1
											0.4	0.9
											0.5	1.2
											0.9	1.1
											1	0.5
											1.1	1.8
											1.4	1.5
											1.6	1.2
											1.7	1.4
											1.9	1.3
											2.5	1.1
											3	1.4
